# Supplementary material for: An AI-Powered Clinical Decision Support System to Predict Flares in Rheumatoid Arthritis: A Pilot Study
Source: MDPI journal article supplement (doi:10.3390/diagnostics13010148), 2023-01-01
Supplement: s1 [file s1]

|     |   |    | Study Phase | Rater | (Current) dosage | IV administration | Anti-CCP | BMI | CDAI | CRP | Cototherapy | DAS28-ESR | Disease duration | ESR | Evaluator VAS-Activity (mm) | HAQ | Patient VAS-Activity (mm) | Patient VAS-Pain (mm) | SDAI | SJC | Smoker Status | TJC | bDMARD |
|-----|---|----|-------------|-------|------------------|-------------------|----------|-----|------|-----|-------------|-----------|------------------|-----|-----------------------------|-----|---------------------------|-----------------------|------|-----|---------------|-----|--------|
| P1  | 1 | R1 |             |       |                  |                   |          |     |      |     |             |           |                  |     |                             |     |                           |                       |      |     |               |     |        |
| P1  | 1 | R2 |             |       |                  |                   |          |     |      |     |             |           |                  |     |                             |     |                           |                       |      |     |               |     |        |
| P1  | 1 | R3 |             |       |                  |                   |          |     |      |     |             |           |                  |     |                             |     |                           |                       |      |     |               |     |        |
| P1  | 1 | R4 |             |       |                  |                   |          |     |      |     |             |           |                  |     |                             |     |                           |                       |      |     |               |     |        |
| P1  | 1 | R5 |             |       |                  |                   |          |     |      |     |             |           |                  |     |                             |     |                           |                       |      |     |               |     |        |
| P2  | 1 | R1 |             |       |                  |                   |          |     |      |     |             |           |                  |     |                             |     |                           |                       |      |     |               |     |        |
| P2  | 1 | R2 |             |       |                  |                   |          |     |      |     |             |           |                  |     |                             |     |                           |                       |      |     |               |     |        |
| P2  | 1 | R3 |             |       |                  |                   |          |     |      |     |             |           |                  |     |                             |     |                           |                       |      |     |               |     |        |
| P2  | 1 | R4 |             |       |                  |                   |          |     |      |     |             |           |                  |     |                             |     |                           |                       |      |     |               |     |        |
| P2  | 1 | R5 |             |       |                  |                   |          |     |      |     |             |           |                  |     |                             |     |                           |                       |      |     |               |     |        |
| P3  | 1 | R1 |             |       |                  |                   |          |     |      |     |             |           |                  |     |                             |     |                           |                       |      |     |               |     |        |
| P3  | 1 | R2 |             |       |                  |                   |          |     |      |     |             |           |                  |     |                             |     |                           |                       |      |     |               |     |        |
| P3  | 1 | R3 |             |       |                  |                   |          |     |      |     |             |           |                  |     |                             |     |                           |                       |      |     |               |     |        |
| P3  | 1 | R4 |             |       |                  |                   |          |     |      |     |             |           |                  |     |                             |     |                           |                       |      |     |               |     |        |
| P3  | 1 | R5 |             |       |                  |                   |          |     |      |     |             |           |                  |     |                             |     |                           |                       |      |     |               |     |        |
| P4  | 1 | R1 |             |       |                  |                   |          |     |      |     |             |           |                  |     |                             |     |                           |                       |      |     |               |     |        |
| P4  | 1 | R2 |             |       |                  |                   |          |     |      |     |             |           |                  |     |                             |     |                           |                       |      |     |               |     |        |
| P4  | 1 | R3 |             |       |                  |                   |          |     |      |     |             |           |                  |     |                             |     |                           |                       |      |     |               |     |        |
| P4  | 1 | R4 |             |       |                  |                   |          |     |      |     |             |           |                  |     |                             |     |                           |                       |      |     |               |     |        |
| P4  | 1 | R5 |             |       |                  |                   |          |     |      |     |             |           |                  |     |                             |     |                           |                       |      |     |               |     |        |
| P5  | 1 | R1 |             |       |                  |                   |          |     |      |     |             |           |                  |     |                             |     |                           |                       |      |     |               |     |        |
| P5  | 1 | R2 |             |       |                  |                   |          |     |      |     |             |           |                  |     |                             |     |                           |                       |      |     |               |     |        |
| P5  | 1 | R3 |             |       |                  |                   |          |     |      |     |             |           |                  |     |                             |     |                           |                       |      |     |               |     |        |
| P5  | 1 | R4 |             |       |                  |                   |          |     |      |     |             |           |                  |     |                             |     |                           |                       |      |     |               |     |        |
| P5  | 1 | R5 |             |       |                  |                   |          |     |      |     |             |           |                  |     |                             |     |                           |                       |      |     |               |     |        |
| P6  | 1 | R1 |             |       |                  |                   |          |     |      |     |             |           |                  |     |                             |     |                           |                       |      |     |               |     |        |
| P6  | 1 | R2 |             |       |                  |                   |          |     |      |     |             |           |                  |     |                             |     |                           |                       |      |     |               |     |        |
| P6  | 1 | R3 |             |       |                  |                   |          |     |      |     |             |           |                  |     |                             |     |                           |                       |      |     |               |     |        |
| P6  | 1 | R4 |             |       |                  |                   |          |     |      |     |             |           |                  |     |                             |     |                           |                       |      |     |               |     |        |
| P6  | 1 | R5 |             |       |                  |                   |          |     |      |     |             |           |                  |     |                             |     |                           |                       |      |     |               |     |        |
| P7  | 1 | R1 |             |       |                  |                   |          |     |      |     |             |           |                  |     |                             |     |                           |                       |      |     |               |     |        |
| P7  | 1 | R2 |             |       |                  |                   |          |     |      |     |             |           |                  |     |                             |     |                           |                       |      |     |               |     |        |
| P7  | 1 | R3 |             |       |                  |                   |          |     |      |     |             |           |                  |     |                             |     |                           |                       |      |     |               |     |        |
| P7  | 1 | R4 |             |       |                  |                   |          |     |      |     |             |           |                  |     |                             |     |                           |                       |      |     |               |     |        |
| P7  | 1 | R5 |             |       |                  |                   |          |     |      |     |             |           |                  |     |                             |     |                           |                       |      |     |               |     |        |
| P8  | 1 | R1 |             |       |                  |                   |          |     |      |     |             |           |                  |     |                             |     |                           |                       |      |     |               |     |        |
| P8  | 1 | R2 |             |       |                  |                   |          |     |      |     |             |           |                  |     |                             |     |                           |                       |      |     |               |     |        |
| P8  | 1 | R3 |             |       |                  |                   |          |     |      |     |             |           |                  |     |                             |     |                           |                       |      |     |               |     |        |
| P8  | 1 | R4 |             |       |                  |                   |          |     |      |     |             |           |                  |     |                             |     |                           |                       |      |     |               |     |        |
| P8  | 1 | R5 |             |       |                  |                   |          |     |      |     |             |           |                  |     |                             |     |                           |                       |      |     |               |     |        |
| P9  | 1 | R1 |             |       |                  |                   |          |     |      |     |             |           |                  |     |                             |     |                           |                       |      |     |               |     |        |
| P9  | 1 | R2 |             |       |                  |                   |          |     |      |     |             |           |                  |     |                             |     |                           |                       |      |     |               |     |        |
| P9  | 1 | R3 |             |       |                  |                   |          |     |      |     |             |           |                  |     |                             |     |                           |                       |      |     |               |     |        |
| P9  | 1 | R4 |             |       |                  |                   |          |     |      |     |             |           |                  |     |                             |     |                           |                       |      |     |               |     |        |
| P9  | 1 | R5 |             |       |                  |                   |          |     |      |     |             |           |                  |     |                             |     |                           |                       |      |     |               |     |        |
| P10 | 1 | R1 |             |       |                  |                   |          |     |      |     |             |           |                  |     |                             |     |                           |                       |      |     |               |     |        |
| P10 | 1 | R2 |             |       |                  |                   |          |     |      |     |             |           |                  |     |                             |     |                           |                       |      |     |               |     |        |
| P10 | 1 | R3 |             |       |                  |                   |          |     |      |     |             |           |                  |     |                             |     |                           |                       |      |     |               |     |        |
| P10 | 1 | R4 |             |       |                  |                   |          |     |      |     |             |           |                  |     |                             |     |                           |                       |      |     |               |     |        |
| P10 | 1 | R5 |             |       |                  |                   |          |     |      |     |             |           |                  |     |                             |     |                           |                       |      |     |               |     |        |

**Figure S1:** Feature importance rating according to individual patient and physician (T1).  
 IV, intravenous; Anti-CCP, anti-citrullinated protein antibody; BMI, body mass index; CDAI, Clinical Disease Activity Index; CRP, C-reactive protein, DAS28-ESR, Disease Activity Index 28-erythrocyte sedimentation rate; VAS, visual analogue scale; HAQ, Health Assessment Questionnaire; SDAI, Simple Disease Activity Index; SJC, swollen joint count; TJC, tender joint count; bDMARD, biologic Disease-Modifying Antirheumatic Drugs. Red represents that the parameter was rated as important, white as not important.

[illegible]

**Figure S2:** Feature importance rating according to individual patient and physician (T2).

IV, intravenous; Anti-CCP, anti-citrullinated protein antibody; BMI, body mass index; CDAI, Clinical Disease Activity Index; CRP, C-reactive protein; DAS28-ESR, Disease Activity Index 28-erythrocyte sedimentation rate; VAS, visual analogue scale; HAQ, Health Assessment Questionnaire; SDAI, Simple Disease Activity Index; SJC, swollen joint count; TJC, tender joint count; bDMARD, biologic Disease-Modifying Antirheumatic Drugs. Red represents that the parameter was rated as important, white as not important.
